# Supplementary material for: 1,25-Dihydroxyvitamin D suppresses M1 macrophages and promotes M2 differentiation at bone injury sites
Source: JCI journal article supplement (doi:10.1172/jci.insight.98773), 2018-09-05
Supplement: sd1 [file 1]

## SUPPLEMENTAL DATA

### **Defining the Role of M1 macrophage in Bone Repair via the Function of 1,25-Dihydroxyvitamin D in M1/M2 Differentiation**

Samiksha Wasnik<sup>1</sup>, Charles H Rundle<sup>2</sup>, David J Baylink<sup>1</sup>, Mohammad Safaie Yazdi<sup>1</sup>, Edmundo E Carreon<sup>1</sup>, Yi Xu<sup>1</sup>, Xuezhong Qin<sup>1,2</sup>, Kin-Hing William Lau<sup>1,2</sup>, Xiaolei Tang<sup>1\*</sup>.

<sup>1</sup>Division of Regenerative Medicine, Department of Medicine, Loma Linda University, Loma Linda, CA.92354, USA

<sup>2</sup>Musculoskeletal Disease Center, Jerry L. Pettis Memorial VA Medical Center, Loma Linda, CA 92357, USA

Running title: 1,25(OH)<sub>2</sub>D Blocks M1 Macrophage-MSC Crosstalk

#### **\*Correspondence should be addressed to:**

Xiaolei Tang, MD/PhD,  
Department of Medicine,  
Division of Regenerative Medicine,  
Loma Linda University,  
Loma Linda, CA. 92354.  
Phone: (909) 651-5891;  
Fax: (909) 558-0428.  
Email: [Xitang@llu.edu](mailto:Xitang@llu.edu).

**The authors have declared that no conflict of interest exists**

**Table S1. List of primers used in this study**

| Gene          | Forward                 | Reverse                  |
|---------------|-------------------------|--------------------------|
| F4/80         | CTTTGG CTATGGGCTTCCAGTC | GCAAGGAGGACAGAGTTTATCGTG |
| IL-1 $\alpha$ | AGGGAGTCAACTCATTGGCG    | ACTTCTGCCTGACGAGCTTC     |
| IL-1 $\beta$  | GTCGCTCAGGGTCACAAGAA    | GTGCTGCCTAATGTCCCCTT     |
| IL-6          | CTGCAAGAGACTTCCATCCAG   | AGTGGTATAGACAGGTCTGTTGG  |
| CD11b         | CCATGACCTTCCAAGAGAATGC  | ACCGGCTTGTGCTGTAGTC      |
| TNF- $\alpha$ | GAActCCAGGCGGTGCCTAT    | TCGGCTGGCACCACTAGTTG     |
| OSM           | ATGCAGACACGGCTTCTAAGA   | TTGGAGCAGCCACGATTGG      |
| CD90          | TGCTCTCAGTCTTGCAGGTG    | TGGATGGAGTTATCCTTGGTGT   |
| CD105         | TGCACTTGGCCTACGACTC     | TGGAGGTAAGGGATGGTAGCA    |
| CD73          | AACCCCTTTCCTCTCAAATCCA  | CAGGGCGATGATCTTATTACAT   |
| OCN           | CTGACCTCACAGATCCCAAGC   | TGGTCTGATAGCTCGTCACAAG   |
| OSX           | GGAAAGGAGGCACAAAGAAGC   | CCCCTTAGGCACTAGGAGC      |
| Runx2         | TTCAACGATCTGAGATTTGTGGG | GGATGAGGAATGCGCCCTA      |
| GAPDH         | TGGCAAAGTGGAGATTGTTGCC  | AAGATGGTGATGGGCTTCCCG    |

Notes: F4/80: adhesion G protein-coupled receptor E1, IL-1 $\alpha$ : Interleukin-1 $\alpha$ ; IL-1 $\beta$ : Interleukin-1 $\beta$ ; CD11b: Cluster of differentiation 11b, IL-6: Interleukin-6; TNF- $\alpha$ : Tumor Necrosis Factor -  $\alpha$ , OSM: Oncostatin M, CD90: Thy1, CD105: Endoglin, CD73: 5'-Nucleotidase, OCN: Osteocalcin, OSX: Osterix, Runx2: Runt related transcription factor 2, GAPDH: Glyceraldehyde-3-phosphate dehydrogenase.

**Table S2. Mean fluorescence intensities (MFIs) of secreted proteins in CD11b<sup>+</sup>F4/80<sup>+</sup> macrophages at fracture sites**

| <b>Day 4</b>                   |                                       |                                   |                                             |                                               |
|--------------------------------|---------------------------------------|-----------------------------------|---------------------------------------------|-----------------------------------------------|
| <b>Proteins\MFIs\Tx</b>        | <b>Intact bones</b>                   | <b>Fractured bones</b>            |                                             |                                               |
|                                |                                       | <b>VC</b>                         | <b>100ng/kg VD</b>                          | <b>1000ng/kg VD</b>                           |
| <b>IL-1<math>\beta</math></b>  | <b>269.6<math>\pm</math>10.33****</b> | <b>994.3<math>\pm</math>51.26</b> | <b>712.3<math>\pm</math>6.6***</b>          | <b>649.5<math>\pm</math>3.6***</b>            |
| <b>IL-12</b>                   | <b>333.5<math>\pm</math>47.5***</b>   | <b>540<math>\pm</math>25.5</b>    | <b>500.3<math>\pm</math>44<sup>ns</sup></b> | <b>450.3<math>\pm</math>38<sup>ns</sup></b>   |
| <b>IL-6</b>                    | <b>485.3<math>\pm</math>44.2****</b>  | <b>815.4<math>\pm</math>5.9</b>   | <b>479.2<math>\pm</math>37.8****</b>        | <b>436.2<math>\pm</math>37.8****</b>          |
| <b>TNF-<math>\alpha</math></b> | <b>435<math>\pm</math>6.6****</b>     | <b>875.6<math>\pm</math>32.2</b>  | <b>868<math>\pm</math>14.7<sup>ns</sup></b> | <b>805.5<math>\pm</math>12.6<sup>ns</sup></b> |
| <b>OSM-M</b>                   | <b>666<math>\pm</math>30.7***</b>     | <b>1162<math>\pm</math>74.3</b>   | <b>946<math>\pm</math>35.8<sup>ns</sup></b> | <b>667.3<math>\pm</math>67.2***</b>           |

| <b>Day 7</b>                   |                                                |                                   |                                                 |                                                |
|--------------------------------|------------------------------------------------|-----------------------------------|-------------------------------------------------|------------------------------------------------|
| <b>Proteins\MFIs\Tx</b>        | <b>Intact bones</b>                            | <b>Fractured bones</b>            |                                                 |                                                |
|                                |                                                | <b>VC</b>                         | <b>100ng/kg VD</b>                              | <b>1000ng/kg VD</b>                            |
| <b>IL-1<math>\beta</math></b>  | <b>1227<math>\pm</math>42.0<sup>ns</sup></b>   | <b>1381<math>\pm</math>72.8</b>   | <b>1661<math>\pm</math>31.8<sup>ns</sup></b>    | <b>1585<math>\pm</math>97.2<sup>ns</sup></b>   |
| <b>IL-12</b>                   | <b>1123<math>\pm</math>25.3***</b>             | <b>1648.5<math>\pm</math>1.2</b>  | <b>1798<math>\pm</math>1.6*</b>                 | <b>1579.5<math>\pm</math>20.0<sup>ns</sup></b> |
| <b>IL-6</b>                    | <b>1641<math>\pm</math>143.1<sup>ns</sup></b>  | <b>1893<math>\pm</math>39.5</b>   | <b>1791<math>\pm</math>25.5<sup>ns</sup></b>    | <b>1769<math>\pm</math>72.1<sup>ns</sup></b>   |
| <b>TNF-<math>\alpha</math></b> | <b>2268<math>\pm</math>177.6<sup>ns</sup></b>  | <b>2349.6<math>\pm</math>57.5</b> | <b>2160<math>\pm</math>19.6<sup>ns</sup></b>    | <b>2101<math>\pm</math>107.3<sup>ns</sup></b>  |
| <b>OSM-M</b>                   | <b>1531.5<math>\pm</math>92.5<sup>ns</sup></b> | <b>1557<math>\pm</math>199.0</b>  | <b>1489.667<math>\pm</math>9.7<sup>ns</sup></b> | <b>1725.5<math>\pm</math>60.5<sup>ns</sup></b> |

**Note:** “VD”: 1,25(OH)<sub>2</sub>D. “VC”: vehicle. “Tx”: treatment. \*P  $\leq$  0.05, \*\*P  $\leq$  0.01, \*\*\*P  $\leq$  0.001, \*\*\*\*P  $\leq$  0.0001, “ns”: not significant. ANOVA test: vehicle vs intact bones, 100ng/kg VD, and 1000ng/kg VD.

**Table S3. Percent of MSC cell populations at days 4 and 7 post fracture surgery**

| Day 4        |                     |                  |                              |                              |
|--------------|---------------------|------------------|------------------------------|------------------------------|
| MSC\%\Tx     | Intact bones        | Fractured bones  |                              |                              |
|              |                     | VC               | 100ng/kg VD                  | 1000ng/kg VD                 |
| <b>CD90</b>  | <b>3.705±0.2***</b> | <b>8.1±0.03</b>  | <b>4.2±0.4 **</b>            | <b>3.9±0.3**</b>             |
| <b>CD105</b> | <b>7.4±2.0*</b>     | <b>14.9±0.5</b>  | <b>9.8±0.7<sup>ns</sup></b>  | <b>6.9±1.95*</b>             |
| <b>CD29</b>  | <b>9.6±2.5*</b>     | <b>20.28±1.3</b> | <b>16.6±2.3<sup>ns</sup></b> | <b>15.3±3.7<sup>ns</sup></b> |
| <b>CD73</b>  | <b>6.42±1.7**</b>   | <b>14.9±0.6</b>  | <b>11.8±1.2<sup>ns</sup></b> | <b>8.1±0.1*</b>              |

| Day 7        |                              |                  |                   |                             |
|--------------|------------------------------|------------------|-------------------|-----------------------------|
| MSC\%\Tx     | Intact bones                 | Fractured bones  |                   |                             |
|              |                              | VC               | 100ng/kg VD       | 1000ng/kg VD                |
| <b>CD90</b>  | <b>7.2±0.2<sup>ns</sup></b>  | <b>10.5±0.9</b>  | <b>16.9±0.7**</b> | <b>19±2.7**</b>             |
| <b>CD105</b> | <b>2±0.5<sup>ns</sup></b>    | <b>3.17±0.8</b>  | <b>7.09±0.9*</b>  | <b>6.5±0.9<sup>ns</sup></b> |
| <b>CD29</b>  | <b>11.5±0.5<sup>ns</sup></b> | <b>11.47±0.8</b> | <b>21.6±2.5**</b> | <b>22.3±0.35**</b>          |
| <b>CD73</b>  | <b>9.0±1.3<sup>ns</sup></b>  | <b>7.8±0.5</b>   | <b>17.02±1.8*</b> | <b>16.0±3.7*</b>            |

**Note:** “VD”: 1,25(OH)<sub>2</sub>D. “VC”: vehicle. “Tx”: treatment. \*P≤ 0.05, \*\*P≤ 0.01, \*\*\*P≤ 0.001, \*\*\*\*P≤ 0.0001, “ns”: not significant. ANOVA test: vehicle vs intact bones, 100ng/kg VD, 1000ng/kg VD.

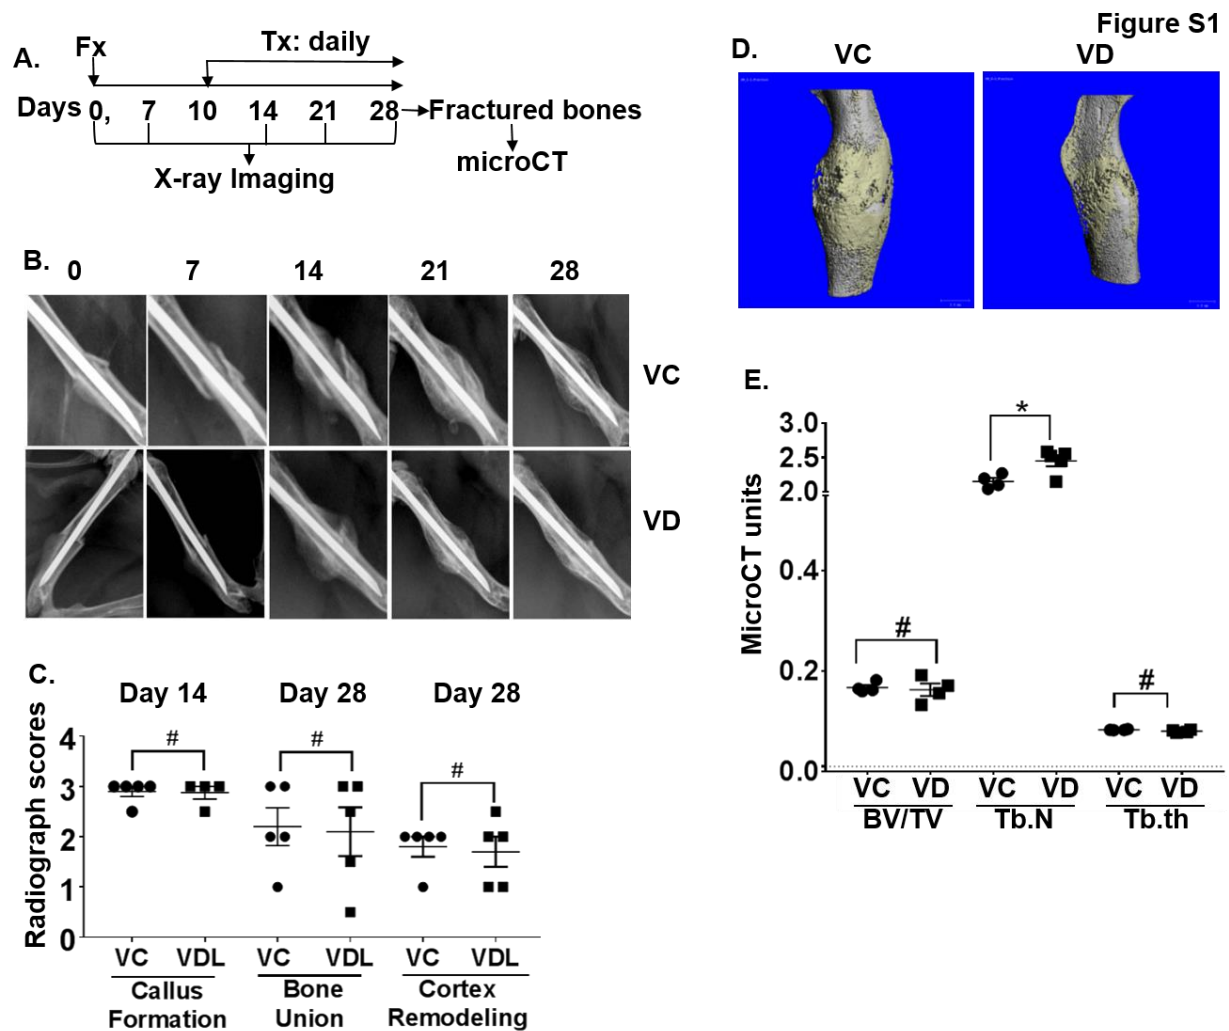

**Figure S1. Local subcutaneous treatment with 1,25(OH)<sub>2</sub>D during the regenerative stage did not impair fracture repair.** *A*) C57BL/6 mice were subject to fracture surgery (Fx). Ten days later, the animals subcutaneously received at the fracture sites a daily dose of either vehicle (VC) or 100ng/kg/mouse 1,25(OH)<sub>2</sub>D (VD). X-ray images of the fractured bones were taken at days 0, 7, 14, 21, and 28. At day 28, fractured bones were analyzed by microCT. *B*) Representative x-ray images of fracture sites are shown. *C*) X-ray images were scored at day 14 for callus formation and at day 28 for bone union and cortex remodeling. # $P > 0.05$ . t-test. N=5. *D*) Representative microCT 3D images are shown. *E*) Cumulative data show BV/TV (bone volume/total volume), Tb.N (trabecular number), and Tb.th (trabecular thickness) from the microCT analysis. \* $P < 0.05$ ; # $P > 0.05$ . t-test. N=5.

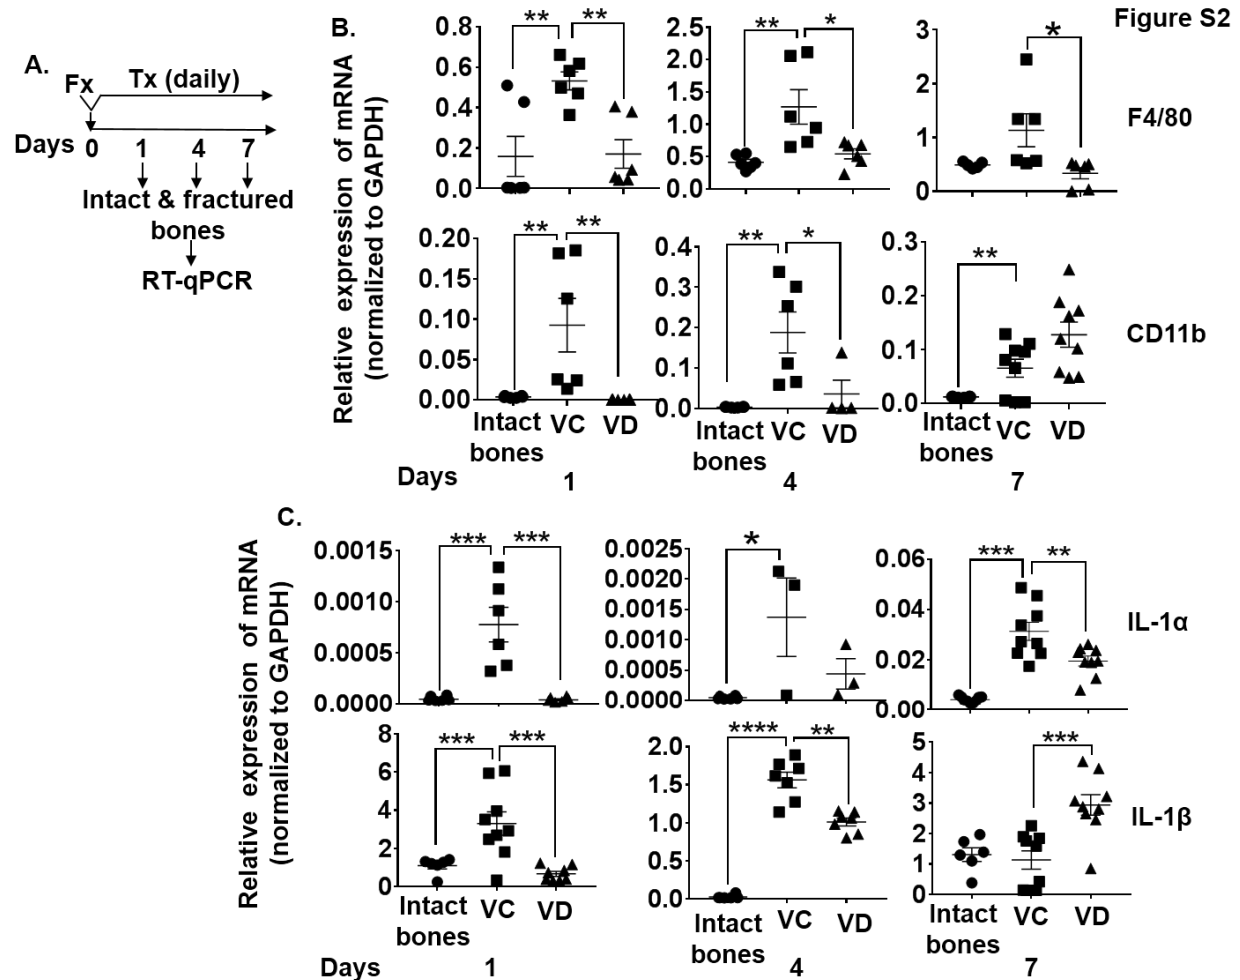

**Figure S2. Local subcutaneous treatment with 1,25(OH)<sub>2</sub>D during the pro-inflammatory stage decreased the expression of marker genes for M1 macrophages at fracture sites.** *A)* C57BL/6 mice were subject to fracture surgery (Fx). Immediately after the fracture surgery, the animals subcutaneously received at the fracture sites a daily treatment (Tx) with vehicle (VC) or 100ng/kg/mouse 1,25(OH)<sub>2</sub>D (VD). At days 1, 4, and 7, contralateral bones (Intact bones) and the bones at fracture sites (fractured bones) were examined by RT-qPCR analysis. *B)* Data show mRNA expressions of the marker genes for pan-macrophage (i.e. F4/80 and CD11b). *C)* Data show mRNA expressions of the marker genes for M1 macrophages (IL-1α and IL-1β). Data are means ± SE. \*P<0.05; \*\*P<0.01; \*\*\*P<0.001; \*\*\*\*P<0.0001. ANOVA test. N=3.

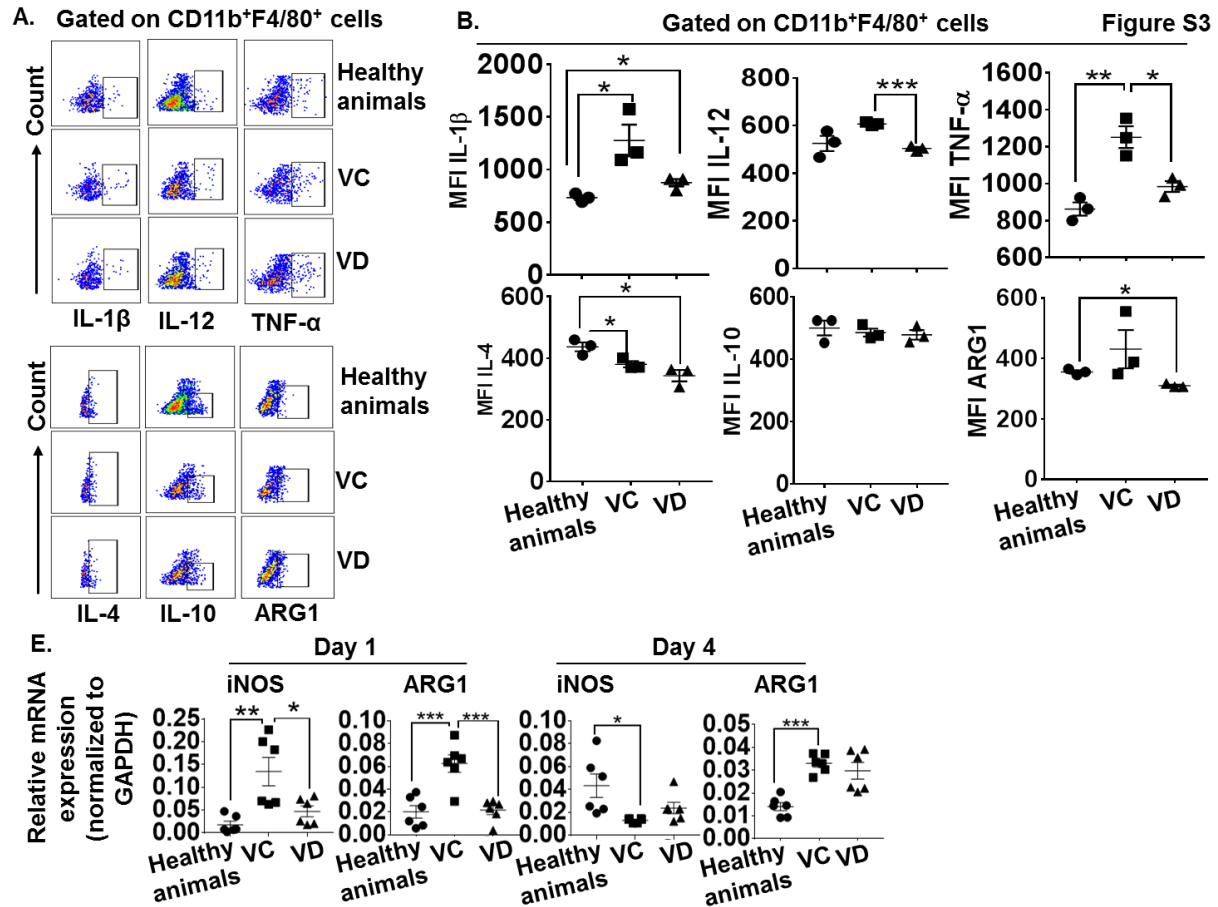

**Figure S3. Bone fracture and 1,25(OH)<sub>2</sub>D treatment had moderate effects on peripheral lymphoid systems.** C57BL/6 mice were subjected to fracture surgery and immediately after the fracture surgery received a daily dose of either vehicle (VC) or 100ng/kg 1,25 (OH)<sub>2</sub>D (VD) subcutaneously near fracture sites. Additionally, a group of healthy animals was also included as a control. At days 1, 4, and 7 post treatments, splenocytes were analyzed by FACS and RT-qPCR. **A)** Representative FACS dot plots show the expressions of IL-1 $\beta$ , IL-12, TNF- $\alpha$ , IL-4, IL-10 and arginase 1 (ARG1) among CD11b<sup>+</sup>F4/80<sup>+</sup> monocytes/macrophages in splenocytes on day 1 after the treatments. **B)** Cumulative data of mean fluorescent intensities (MFIs) of IL-1 $\beta$ , IL-12, TNF- $\alpha$ , IL-4, IL-10, and ARG1 in CD11b<sup>+</sup>F4/80<sup>+</sup> monocytes/macrophages in splenocytes on day 1 after the treatments. **E)** RT-qPCR analyses show the mRNA expressions of iNOS and ARG1 in the splenocytes at days 1 and 4 after the treatments. \*P<0.05, \*\*P<0.01, \*\*\*P<0.001. Two way ANOVA test. N=3.

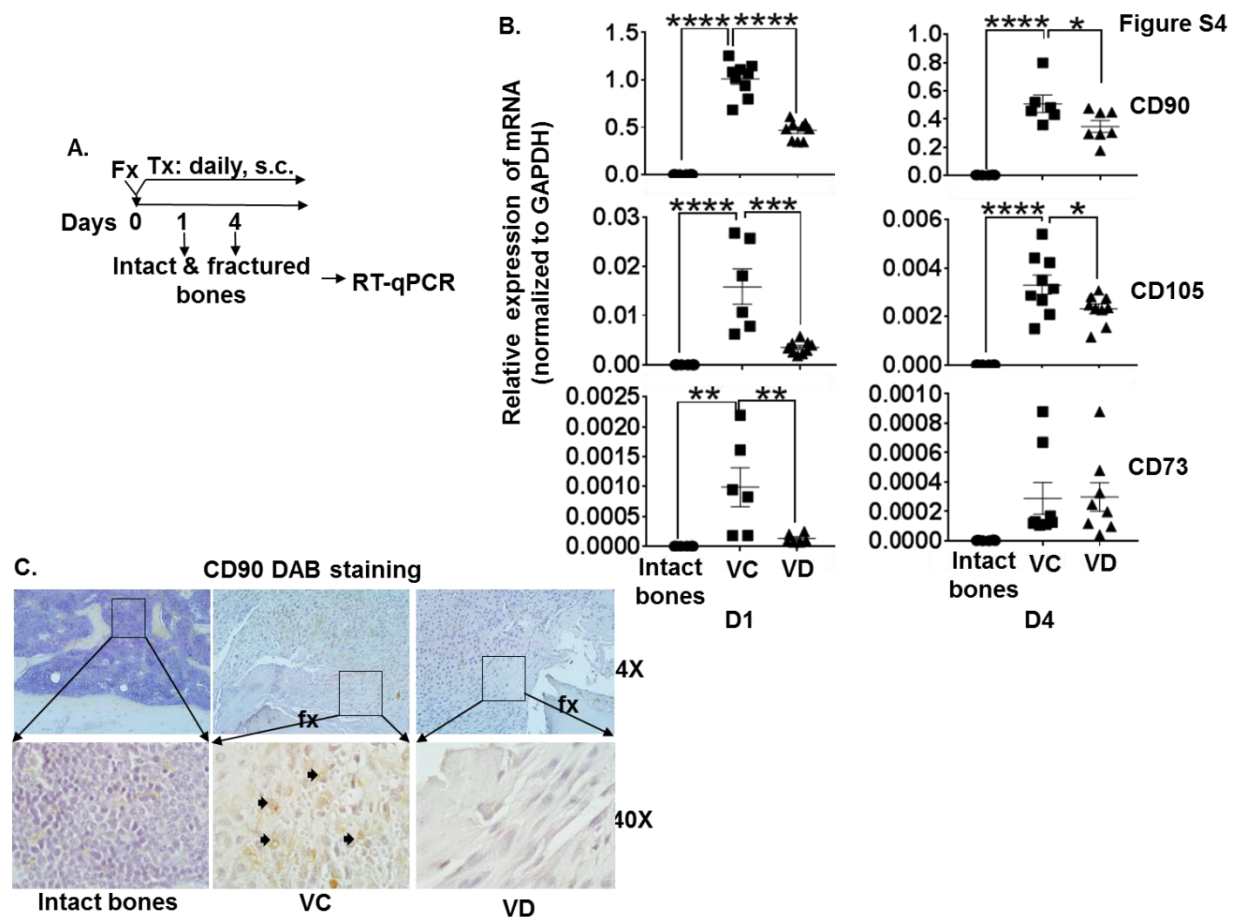

**Figure S4. 1,25(OH)<sub>2</sub>D, when locally administered at proinflammatory stage, decreased the expressions of MSC markers.** **A)** C57BL/6 mice were subjected to fracture surgery (Fx). Immediately after the fracture surgery, the animals subcutaneously received a daily dose of either vehicle (VC) or 1,25(OH)<sub>2</sub>D (100ng/kg) (VD) near fracture sites. Intact and fractured bones were collected from the animals at days 1, 4, and 7 for analysis by RT-qPCR. **B)** Data show the mRNA expressions of CD90, CD105, and CD73 at days 1 and 4. Data are means ± SEM. \*P<0.05; \*\*P<0.005; \*\*\*P<0.001; \*\*\*\*P<0.0001. ANOVA test. N=3. **C)** Paraffin sections of intact and fractured bones were stained for CD90 by DAB staining. Representative images are shown.



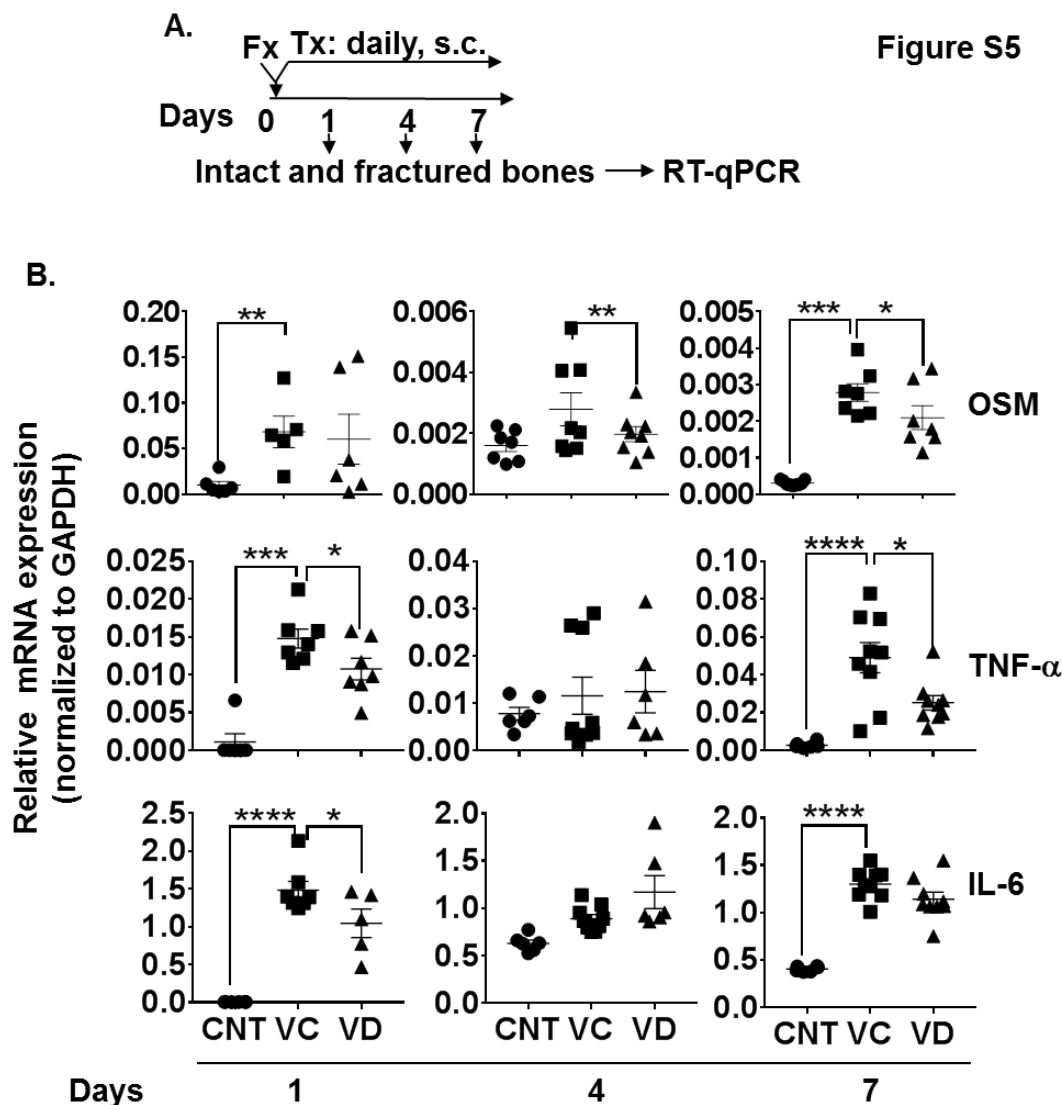

**Figure S5. Local subcutaneous treatment with 1,25(OH)<sub>2</sub>D during pro-inflammatory stage decreased the expression of marker genes of M1 macrophage-associated proteins important for osteogenic priming of MSCs and for bone repair.** *A*) C57BL/6 mice were subjected to fracture surgery (Fx), treatments (Tx), and analyses as described in Figure S2. *B*) Data show the mRNA expressions of oncostatin-M (OSM), TNF- $\alpha$ , and IL-6 at days 1, 4, and 7 after the treatments.
